# Supplementary material for: Amino Acid Plasma Profiles from a Prolonged-Release Protein Substitute for Phenylketonuria: A Randomized, Single-Dose, Four-Way Crossover Trial in Healthy Volunteers
Source: MDPI journal article supplement (doi:10.3390/nu12061653), 2020-06-02
Supplement: s1 [file s1]

## Specifications for the Test product (APR-1301-01 modified-release AA mixture)

| Ingredient       | g in a sachet of 24g  | g for 100g of product  |
|------------------|-----------------------|------------------------|
| L-Serine         | 0.6100                | 2.5417                 |
| L-Threonine      | 0.9000                | 3.7500                 |
| L-Leucine        | 2.0700                | 8.6250                 |
| Glicine          | 0.9000                | 3.7500                 |
| L-Alanine        | 0.5400                | 2.2500                 |
| L-Arginine       | 0.7200                | 3.0000                 |
| L-Cystine        | 0.3600                | 1.5000                 |
| L-Glutamine      | 3.6000                | 15.0000                |
| L-Histidine      | 0.5032                | 2.0967                 |
| L-Aspartic Acid  | 1.0800                | 4.5000                 |
| L-Proline        | 1.0800                | 4.5000                 |
| L-Isoleucine     | 0.9900                | 4.1250                 |
| L-Lysine         | 1.2600                | 5.2500                 |
| L-Tryptophan     | 0.3600                | 1.5000                 |
| L-Valine         | 0.9000                | 3.7500                 |
| L-Methionine     | 0.2500                | 1.0417                 |
| Taurine          | 0.0500                | 0.2083                 |
| L-Carnitine      | 0.0200                | 0.0833                 |
| L-Tyrosine       | 1.8000                | 7.5000                 |
| Ingredient       | mg in a sachet of 24g | mg for 100g of product |
| choline          | 77.143                | 321.429                |
| inositol         | 51.429                | 214.288                |
| vitamin A        | 0.311                 | 1.296                  |
| vitamin D        | 0.006                 | 0.025                  |
| vitamin E        | 3.231                 | 13.463                 |
| vitamin K        | 0.024                 | 0.100                  |
| vitamin C        | 32.306                | 134.608                |
| thiamin          | 0.471                 | 1.963                  |
| riboflavin       | 0.454                 | 1.892                  |
| niacin           | 6.429                 | 26.788                 |
| vitamin B6       | 0.621                 | 2.588                  |
| folic acid       | 0.064                 | 0.267                  |
| vitamin B12      | 0.001                 | 0.0042                 |
| biotin           | 0.013                 | 0.054                  |
| pantothenic acid | 2.571                 | 10.713                 |
| potassium        | 300.017               | 1250.071               |
| calcium          | 321.429               | 1339.288               |
| magnesium        | 72.857                | 303.571                |
| iron             | 5.571                 | 23.213                 |
| zinc             | 3.429                 | 14.288                 |
| copper           | 0.343                 | 1.429                  |
| manganese        | 0.600                 | 2.500                  |
| selenium         | 0.014                 | 0.058                  |
| chromium         | 0.011                 | 0.046                  |
| molybdenum       | 0.021                 | 0.088                  |
| iodine           | 0.054                 | 0.225                  |
| phosphorus       | 249.694               | 1040.392               |
| chlorine         | 0.1791                | 0.7462                 |
| sodium           | 5.934                 | 24.724                 |

# Specification for the REFERENCE product (APR-1301-01 immediate-release AA mixture)

| Ingredient       | g in a sachet of 24g  | g for 100g of product  |
|------------------|-----------------------|------------------------|
| L-Serine         | 0.6100                | 2.5417                 |
| L-Threonine      | 0.9000                | 3.7500                 |
| L-Leucine        | 2.0700                | 8.6250                 |
| Glicine          | 0.9000                | 3.7500                 |
| L-Alanine        | 0.5400                | 2.2500                 |
| L-Arginine       | 0.7200                | 3.0000                 |
| L-Cystine        | 0.3600                | 1.5000                 |
| L-Glutamine      | 3.6000                | 15.0000                |
| L-Histidine      | 0.5032                | 2.0967                 |
| L-Aspartic Acid  | 1.0800                | 4.5000                 |
| L-Proline        | 1.0800                | 4.5000                 |
| L-Isoleucine     | 0.9900                | 4.1250                 |
| L-Lysine         | 1.2600                | 5.2500                 |
| L-Tryptophan     | 0.3600                | 1.5000                 |
| L-Valine         | 0.9000                | 3.7500                 |
| L-Methionine     | 0.2500                | 1.0417                 |
| Taurine          | 0.0500                | 0.2083                 |
| L-Carnitine      | 0.0200                | 0.0833                 |
| L-Tyrosine       | 1.8000                | 7.5000                 |
| Ingredient       | mg in a sachet of 24g | mg for 100g of product |
| choline          | 77.143                | 321.429                |
| inositol         | 51.429                | 214.288                |
| vitamin A        | 0.311                 | 1.296                  |
| vitamin D        | 0.006                 | 0.025                  |
| vitamin E        | 3.231                 | 13.463                 |
| vitamin K        | 0.024                 | 0.100                  |
| vitamin C        | 32.306                | 134.608                |
| thiamin          | 0.471                 | 1.963                  |
| riboflavin       | 0.454                 | 1.892                  |
| niacin           | 6.429                 | 26.788                 |
| vitamin B6       | 0.621                 | 2.588                  |
| folic acid       | 0.064                 | 0.267                  |
| vitamin B12      | 0.001                 | 0.0042                 |
| biotin           | 0.013                 | 0.054                  |
| pantothenic acid | 2.571                 | 10.713                 |
| potassium        | 300.017               | 1250.071               |
| calcium          | 321.429               | 1339.288               |
| magnesium        | 72.857                | 303.571                |
| iron             | 5.571                 | 23.213                 |
| zinc             | 3.429                 | 14.288                 |
| copper           | 0.343                 | 1.429                  |
| manganese        | 0.600                 | 2.500                  |
| selenium         | 0.014                 | 0.058                  |
| chromium         | 0.011                 | 0.046                  |
| molybdenum       | 0.021                 | 0.088                  |
| iodine           | 0.054                 | 0.225                  |
| phosphorus       | 249.694               | 1040.392               |
| chlorine         | 0.1791                | 0.7462                 |
| sodium           | 5.934                 | 24.724                 |
