# Supplementary material for: Amino Acid Plasma Profiles from a Prolonged-Release Protein Substitute for Phenylketonuria: A Randomized, Single-Dose, Four-Way Crossover Trial in Healthy Volunteers
Source: Nutrients. 2020 Jun 2;12(6):1653. doi: 10.3390/nu12061653 (PMC7352445; doi:10.3390/nu12061653)
Supplement: Supplementary file 1 [file nutrients-12-01653-s001.zip]

Archive with 4 entries (4 files):
- Suppl figures nd Tables/Supplemental figure 1.jpg
- Suppl figures nd Tables/Supplemental figure 2.jpg
- Suppl figures nd Tables/Supplemental Table S1. Inclusion and Exclusion criteria.docx
- Suppl figures nd Tables/Supplemental Table S2.AA composition TEST-REFERENCE.pdf
